# Supplementary material for: A π-conjugated dual-functional redox mediator facilitates the construction of dendrite-free lithium–oxygen batteries
Source: Royal Society of Chemistry journal article supplement (doi:10.1039/d2ta07201g), 2022-12-05
Supplement: d2ta07201g1.pdf [file d2ta07201g1.pdf]

## Supplementary Materials

### **$\pi$ -Conjugated Dual-Functional Redox Mediator Facilitate the Construction of Dendrites-Free Lithium-Oxygen Batteries**

Chu-Yue Li <sup>a</sup>, Min-Sheng Wu <sup>a</sup>, Wei-Rong Chen <sup>a</sup>, Qian-Yan Wang <sup>a</sup>, Yuan-Jia Rong <sup>a</sup>, Xiao-Ping Zhang <sup>a\*</sup>

#### **Experimental Section<sup>1-3</sup>**

##### **MWCNT cathode**

MWCNT (XFNANO, 8-15nm), single layer graphene and polyvinylidene fluoride (PVDF) were mixed with weight ratio of 8:1:1 in N- methyl- 2- pyrrolidone (NMP). The mixture was ultrasonicated for 30 minutes followed by magnetic stirring for 24 hours. And then, the slurry was casted onto the round- shape carbon paper with a diameter of 11 mm and a thickness of ~0.2 mm and vacuum dried at 80 °C for 24 hours. The loading weight of the cathode was ~0.1mg. The loading area was ~0.25 cm<sup>2</sup>.

##### **Li anode**

The Li foil of thickness 0.2 mm was cut into 15.6 mm diameter discs.

##### **Cu foil**

A 0.2 mm thick Cu foil was cut into a disc of 11.0 mm in diameter.

### **Assembling Li-O<sub>2</sub> coin cell**

Two-electrode system cells were assembled using CR2032-type coin cells with hole for O<sub>2</sub> channel in an Ar-filled glove box (O<sub>2</sub> and H<sub>2</sub>O < 0.5 ppm). The lithium-oxygen batteries were assembled with MWCNT cathode, Waterman GF/A glass fiber separators and lithium metal anodes. The amount of 1.0 M lithium bis(trifluoromethane sulfonyl)imide/ Methyl sulfoxide (LiTFSI/ DMSO) electrolyte in a coin cell is ~120  $\mu$ L. 100 mM lithium bromide (LiBr, Adamas, 99.99%) or tert-Butylmethoxyphenylsilyl Bromide (TBMPSiBr, Sigma-Aldrich, 96%) is added as redox mediators. After assembly, the Li-O<sub>2</sub> batteries are transferred into a glass test chamber inflated with 1.0m bar of high-purity O<sub>2</sub> and rest for 3h.

Three-electrode system cells were using a silicon carbon rod as the working electrode, Au as the counter electrode and Ag as a reference electrode.

### **Assembling Li | Li symmetric batteries and Li | Cu batteries**

Symmetric Li | Li metal batteries are assembled using CR2032-type coin cells using the Li foil as working electrodes, Waterman GF/C as separator. The amount of 1.0 M lithium hexafluorophosphate/ ethylene carbonate / dimethyl carbonate (LiPF<sub>6</sub>/EC/DMC) electrolyte in a coin cell was ~70  $\mu$ L.

Li | Cu batteries were assembled using CR2025-type coin cells. The amount of 1.0 M Lithium hexafluorophosphate/ ethylene carbonate / dimethyl carbonate (LiPF<sub>6</sub>/EC/DMC) electrolyte in a coin cell was ~70  $\mu$ L. 100 mM lithium bromide (LiBr) or tert-Butylmethoxyphenylsilyl Bromide (TBMPSiBr) is added as redox mediators in both Li | Li symmetric batteries and Li | Cu batteries.

### **Electrochemical analysis**

Galvanostatic discharging/ charging curve tests are using the LAND electrochemical testing system. Cyclic voltammetry (CV) measurement is tested using Bio-logic VSP in the voltage range of 2.0-4.2 V at a scan rate of 0.1 mV/s. And in a three-electrode system, the voltage range is -0.8-1.8V at a scan rate of 50 mV/s. Electrochemical Impedance Spectroscopy (EIS) is performed using Gamry Interface 5000 E with a voltage amplitude of 10 mV and a frequency range of  $10^6$  to  $10^{-1}$ .

### **Characterization**

Lithium-oxygen batteries after cycling, are disassembled in the argon-filled glove box. Then, the anodes were washed in 1,2-Diethoxyethane (DME) for 30 min, and dried for 2 h. Field emission scanning electron microscopy (SEM, Apreo 2C) was used to observe the microstructure of the lithium anodes. Fourier transform infrared spectroscopy (FTIR) was

performed using a Bruker Scientific spectrometer (TENSOR II) from 4000 to 400  $\text{cm}^{-1}$ . The X-ray photoelectron spectroscopy (XPS) results were obtained on a Thermo Fisher ESCALAB Xi+ spectrometer with a monochromatic Al  $K\alpha$  X-ray source.

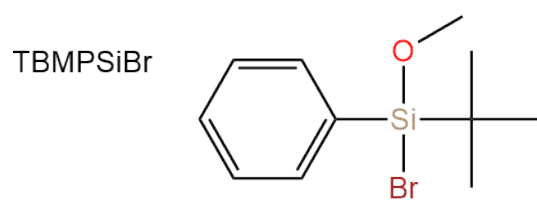

**Fig S1.** The structural formula of tert-Butylmethoxyphenylsilyl Bromide.

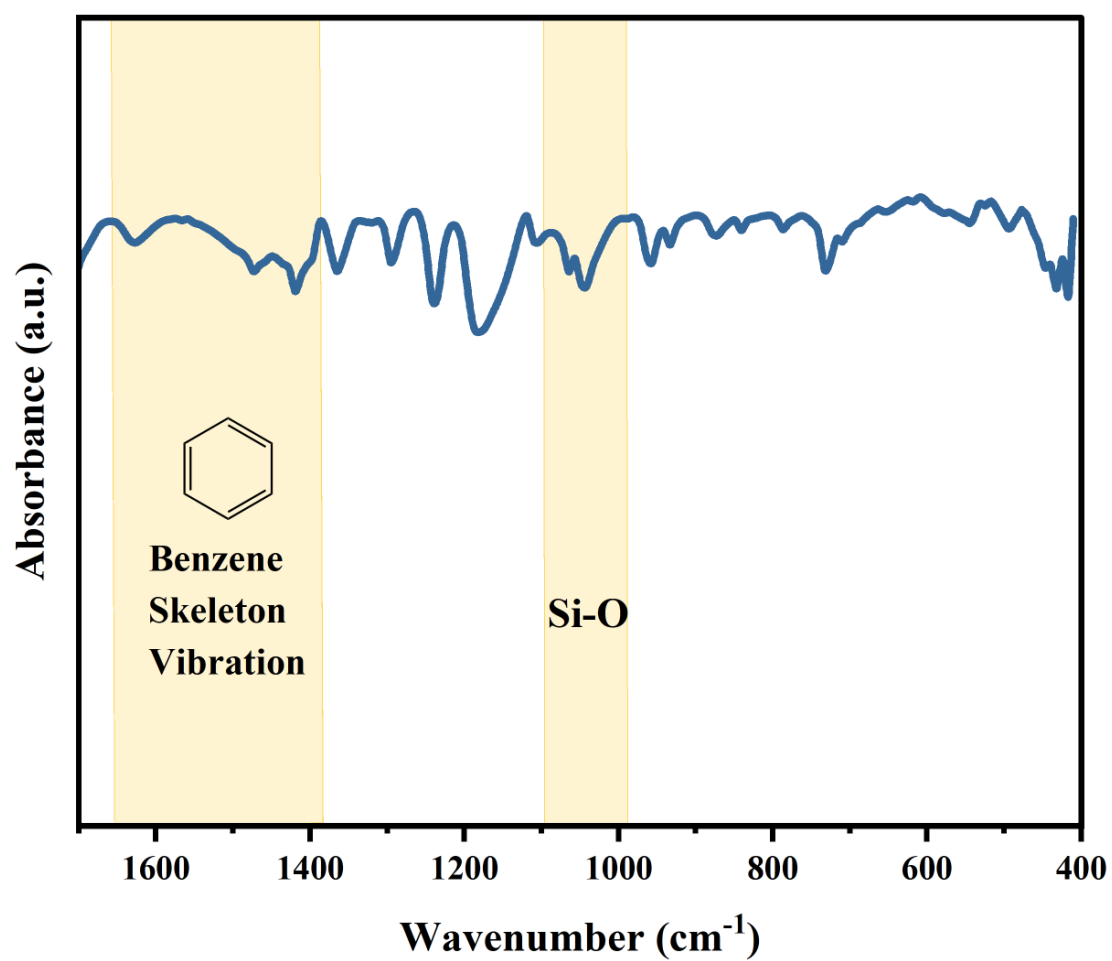

**Fig S2.** FTIR spectra of lithium metal tablet after dropping 20  $\mu\text{L}$  TBMPSiBr | DMSO | LiTFSI electrolyte.

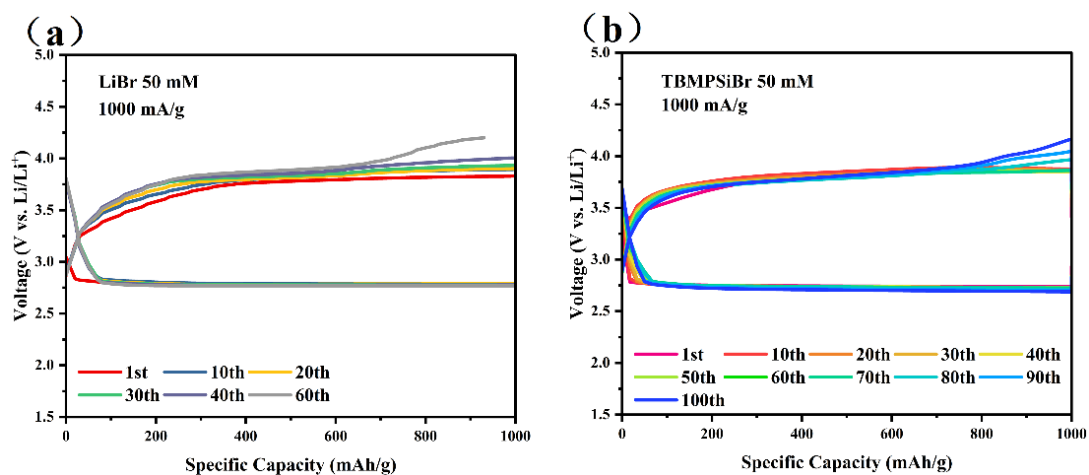

**Fig S3.** Cycling stability of the lithium-oxygen batteries with 50 mM (a) LiBr or (b) TBMPSiBr additives.

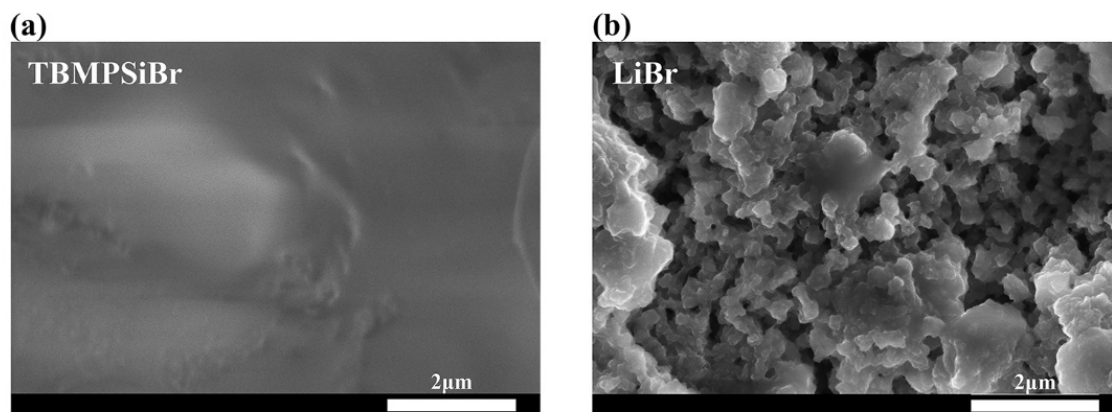

**Fig S4.** SEM images of the lithium anode in the 50 mM (a) TBMPSiBr-containing (b) LiBr-containing lithium-oxygen battery after 30 cycles.

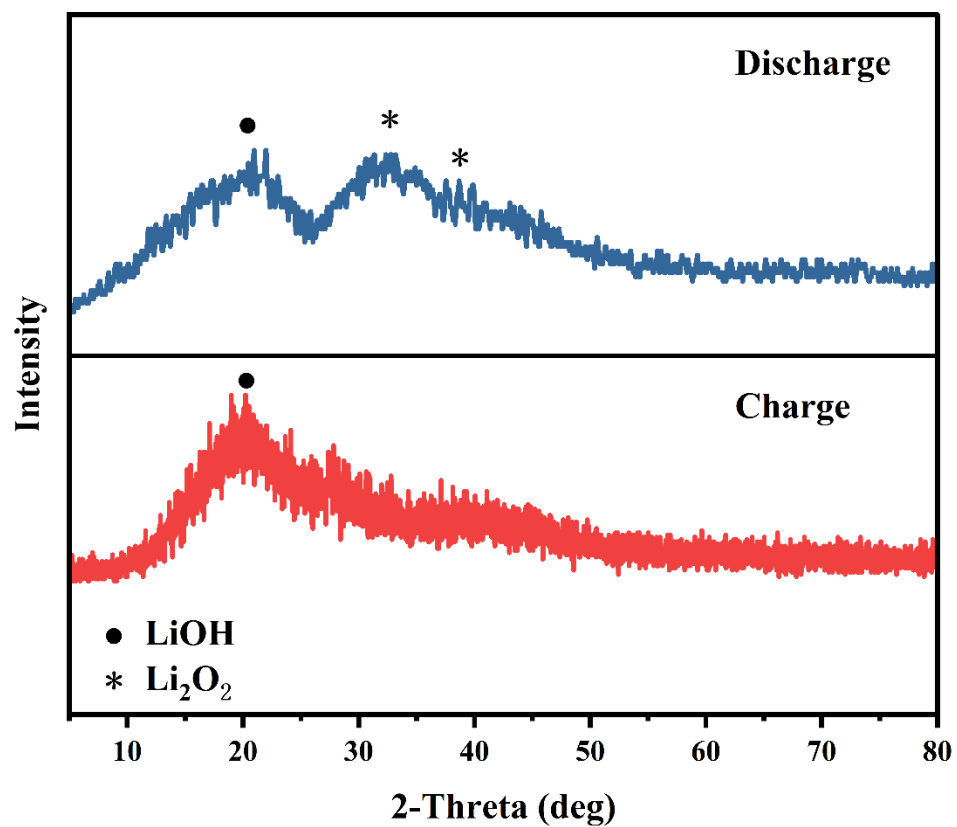

**Fig S5.** XRD patterns of the cathode at the end of discharge and the cathode at the end of charge.

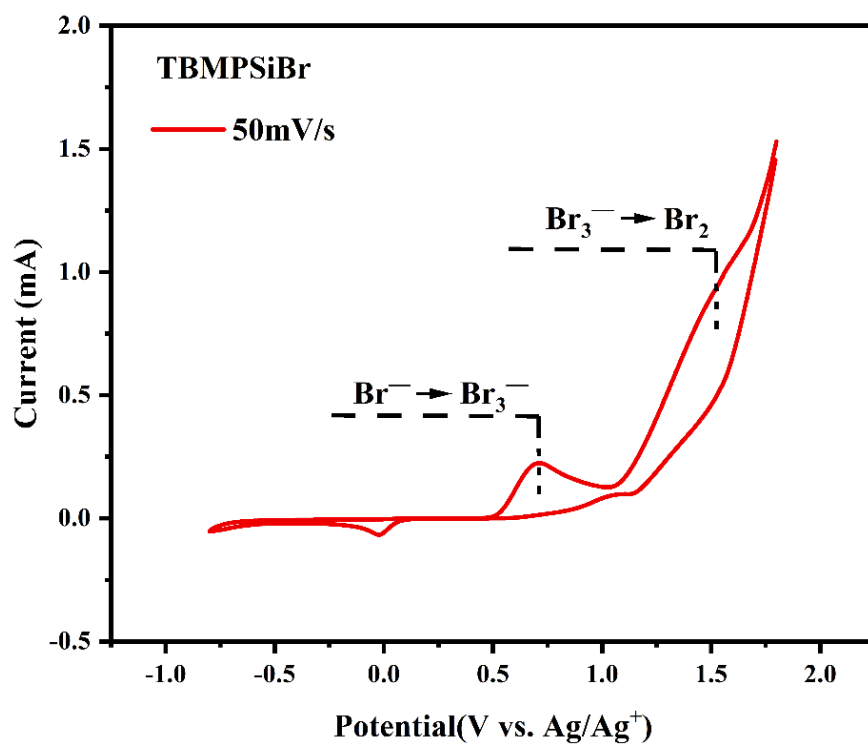

**Fig S6.** Cyclic voltammogram (CV) curves for a three-electrode system.

The scan rate is 50 mV/s.

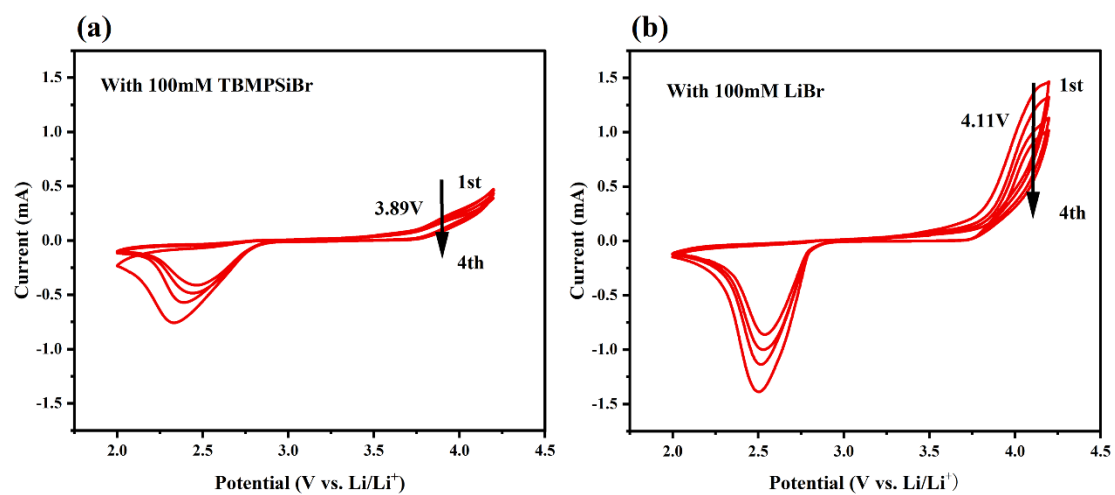

**Fig S7.** Cyclic voltammograms of lithium-oxygen batteries with (a) 100 mM TBMPsSiBr and (b) 100 mM LiBr. The scan rate is 0.1 mV/s

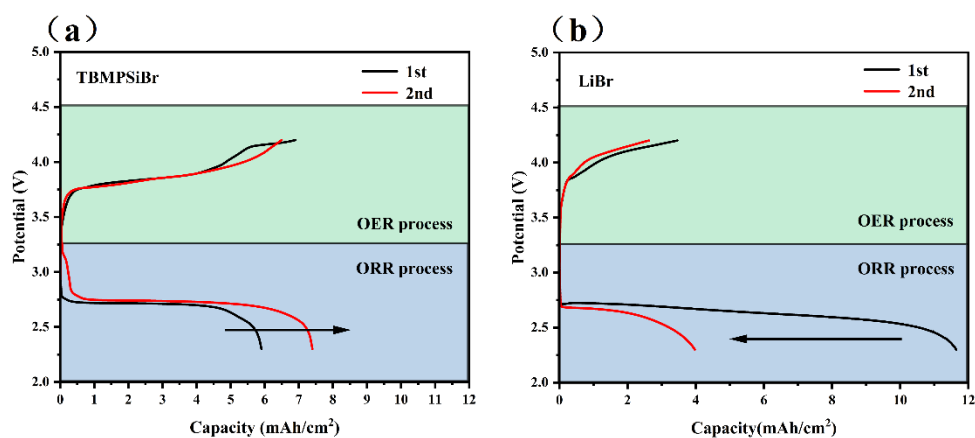

**Fig S8.** Voltage profiles of the first and second cycles of lithium-oxygen batteries. (a) TBMPSiBr (b) LiBr.

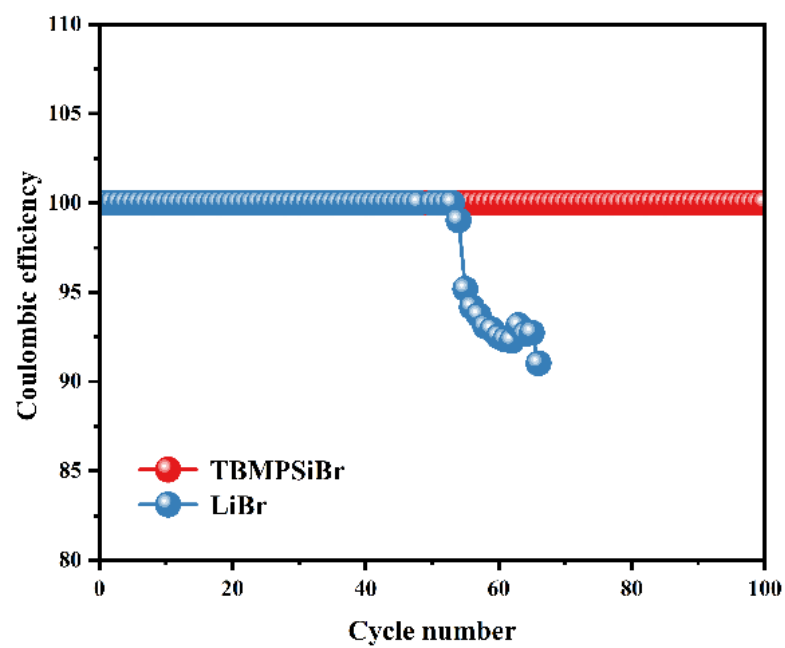

**Fig S9.** The comparison of coulombic efficiency of 50 mM TBMPSiBr or LiBr-containing lithium-oxygen batteries

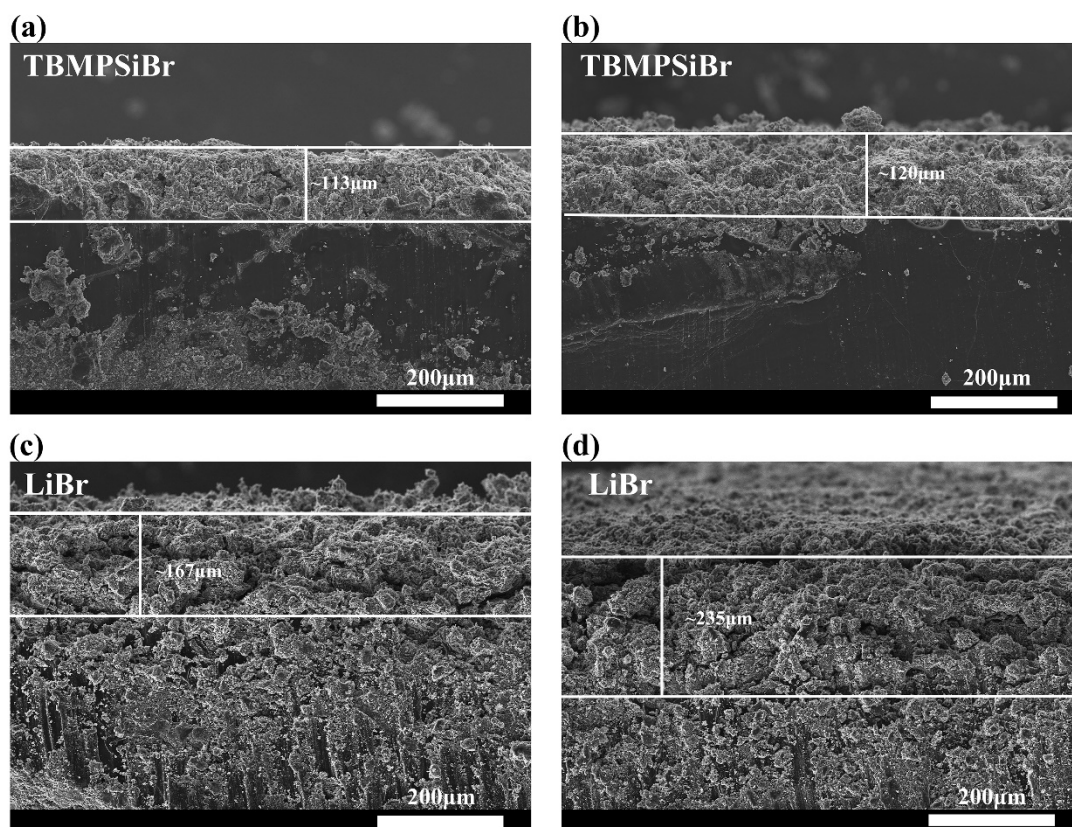

**Fig. S10** Cross-section SEM images of lithium metal anodes after (a) 30 cycles and (b) 50 cycles of TBMPSiBr-containing lithium metal anodes, (c) 30 cycles and (d) 50 cycles of LiBr-containing lithium metal anodes tested under a current density of 1000 mAh/g and a current at 1000 mA/g.

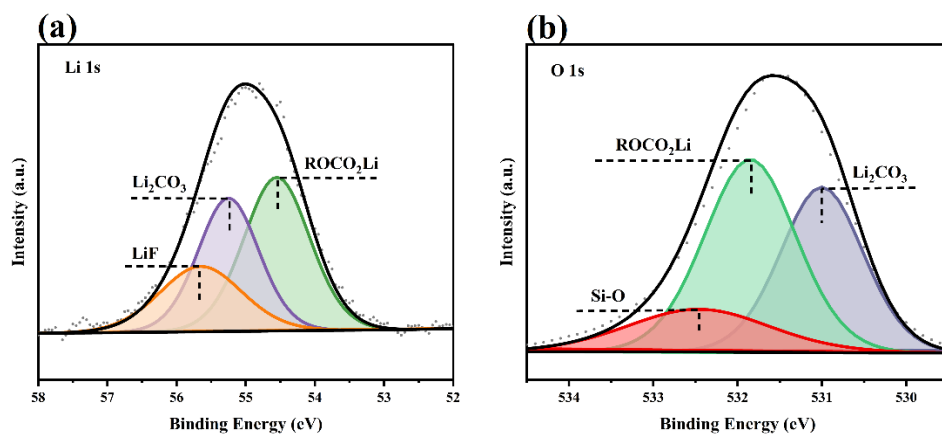

**Fig. 11** XPS spectra for the lithium anode in the TBMPSiBr-containing lithium-oxygen battery after 30 cycles. (a) Li 1s. (b) O 1s.

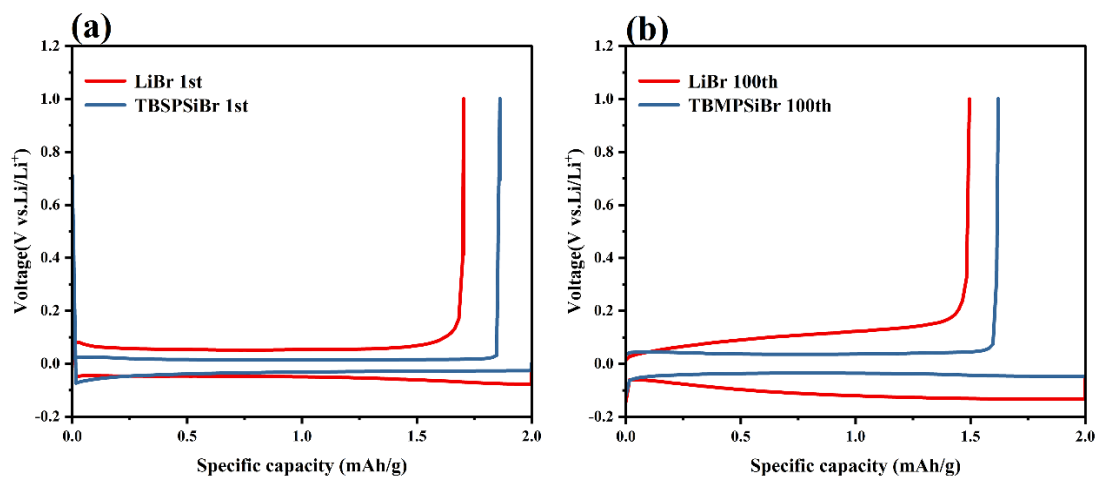

**Fig. S12** Electrochemical performance of Li | Cu batteries. The electrodes are stripped/plated at a current density of  $1 \text{ mA cm}^{-2}$  with a fixed capacity of  $2 \text{ mA h cm}^{-2}$ . Galvanostatic discharge/charge profiles with 100 mM TBMPSiBr or LiBr additive at 1st cycle (a) 100th cycle (b).

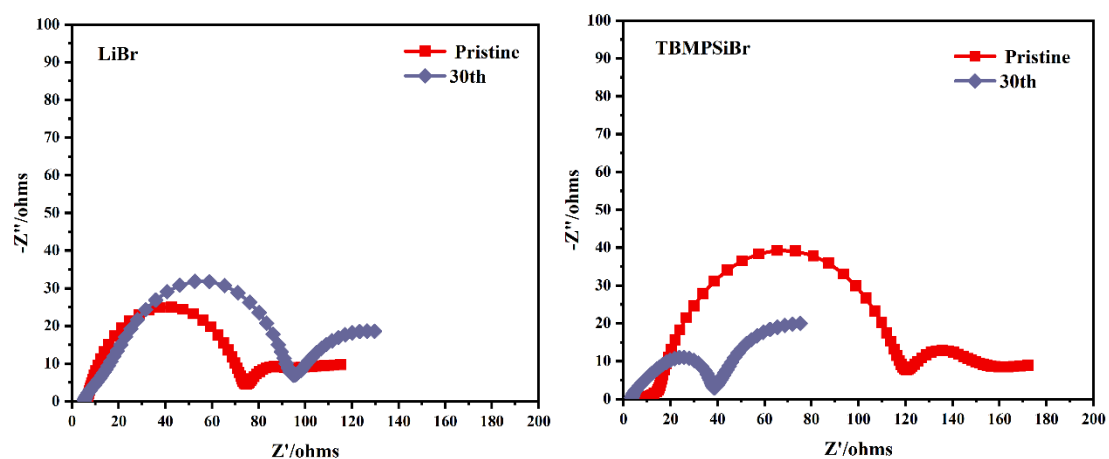

**Fig.S13** EIS spectra for (a) TBMPSiBr (b) LiBr.

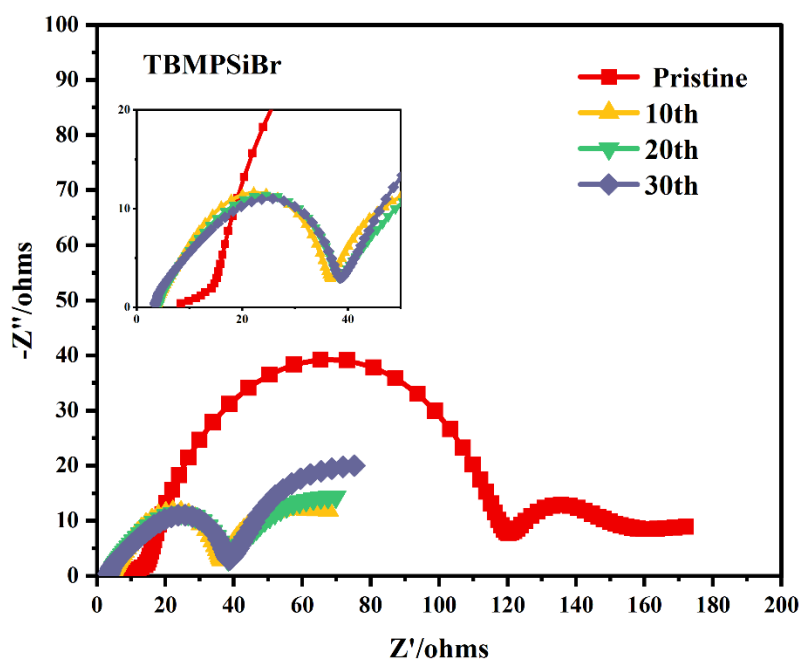

**Fig. S14** The change of impedance for Li | Li symmetric batteries with TBMPSiBr.

1. T. Zhang, K. Liao, P. He and H. Zhou, *Energy & Environmental Science*, 2016, **9**, 1024-1030.
2. Y. N. Li, F. L. Jiang, Z. Sun, O. Yamamoto, N. Imanishi and T. Zhang, *ACS Appl. Mater. Interfaces*, 2021, **13**, 16437-16444.
3. X. P. Zhang, Y. Y. Sun, Z. Sun, C. S. Yang and T. Zhang, *Nat Commun*, 2019, **10**, 3543.
